# Supplementary material for: Understanding the environmental fate of pesticides in South African planted forests: Part 1 – concentrations of pesticides in soil and risk posed to non-target soil organisms
Source: Research Square preprint supplement (doi:10.21203/rs.3.rs-6886614/v1), 2025-08-07
Supplement: Supplementary file 1 [file 246ae99cff3de783186bc98c.docx]

**Online Resource 1** Weather conditions in a trial investigating the environmental fate of pesticides in South African forest plantations (August 2019–October 2021)

**Online Resource 2** Environmental fate and ecotoxicity data for herbicides used in South African forest plantations according to the Pesticides Properties Database (Adapted from Ndlovu et al. 2022)

| **Environmental fate** | | | | | | | | | |
| --- | --- | --- | --- | --- | --- | --- | --- | --- | --- |
|  | Kd | Koc | pKa at 25 ˚C | Kow | Field DT50 in soil | DT50 in water | DT50 insediment/water-sediment | Water solubility at 20 ˚C | |
|  | (ml g-1) | (ml g-1) | - | (log P) | (days) | (days) | (days) | (mg L-1) | |
| glyphosate | 209.4 | 1 424 | 2.34 | -3.2 | 23.79 |  |  | 10 500 | |
| triclopyr |  | 27 | 2.61 | -0.45 | 30 | 24.8 | 29.2 | 4402 | |
| metazachlor | 0.78 | 54.0 | Non-ionic | 2.49 | 6.8 | 216 | 20.6 | 450 | |
| **Human-related risk** | | | | | | | | | |
|  | Drinking water standard | Acute oral LD50  (rats) | Inhalation LC50  (rats) | NOAEL  (2 year) | ARfD | Acceptable Daily Intake  (ADI) | WHO Hazard class | | |
|  | (μg L⁻¹) | (mg kg-1 bw) | (mg L-1 bw) | (mg kg-1 bw) | (mg kg-1 bw day-1) | (mg kg-1 bw day-1) | - | | |
| glyphosate |  | > 2 000 | > 5 | 150 | 0.5 | 0.5 | III (Slightly hazardous) | | |
| triclopyr |  | 630 | > 4.8 | 3 | 0.3 | 0.3 | II (Moderately hazardous) | | |
| metazachlor | 0.1 | 3 480 | 34.5 | 3.6 | 0.5 | 0.08 | III (Slightly hazardous) | | |
| **Terrestrial organism related risk** | | | | | | | | | |
|  | Acute LC50 earthworms | Chronic NOEC earthworms | Acute LD50 oral honeybees (*Apis* spp.) | Acute LD50 contact honeybees (*Apis* spp.) | | Acute LD₅₀ birds | | Chronic NOEL birds | |
|  | (mg kg-1 soil) | (mg kg-1 soil) | (µg bee-1) | (µg bee-1) | | (mg kg⁻¹ bw) | | (mg kg⁻¹ bw day-1) | |
| glyphosate | > 5 600 | >21.3 | 100 | > 100 | | > 2 250 | | 116 | |
| triclopyr | > 521 | 6 | > 100 | > 100 | | 1 698 | | 16.95 | |
| metazachlor | 500 | >2.3 | > 72.2 | > 100 | | > 2 000 | | 76.5 | |
| **Aquatic organism related risk** | | | | | | | | | |
|  | Acute LC50 trout  (96 h) | Acute EC50 *Daphnia*  (48 h) | Acute LC₅₀ aquatic crustaceans  (96 h) | Acute LC₅₀ mayflies  (96 h) | Acute EC50 algae  (72 h) | African indigenous species | Chronic NOEC freshwater fish  (21 days) | Chronic NOEC freshwater invertebrates  (21 days) | HC5 to protect 95% of freshwater species |
|  | (mg L-1) | (mg L-1) | (mg L⁻¹) | (mg L⁻¹) | (mg L⁻¹) | (mg L⁻¹) | (mg L⁻¹) | (mg L⁻¹) | (μg L-1) |
| glyphosate | >100 | >100 | 40 | - | 19 |  | 3.2 | 12.5 | Short-term: 2503  Long-term: 23 |
| triclopyr | 117 | 132.9 |  | - | 181.1 |  | 46.3 | 48.5 |  |
| metazachlor | 8.5 | 33 |  |  | 0.0162 |  | 2.15 | 0.1 |  |

1 Johnson WG, Lavy TL, Gbur EE. 1995. Sorption, mobility and degradation of triclopyr and 2,4-D on four soils. *Weed Science* 43: 678–684.

2 Royal Society of Chemistry. 1990. *The agrochemicals handbook* (2nd edn). Cambridge: Royal Society of Chemistry.

3 Mensah PK, Palmer CG, Muller WJ. 2013. Derivation of South African water quality guidelines for Roundup® using species sensitivity distribution. *Ecotoxicology and Environmental Safety* 96: 24-31.

Kd – the soil distribution coefficient/soil adsorption coefficient represents the ratio of solid phase to solute chemical concentrations, at equilibrium; Koc – the soil organic (OC) affinity coefficient/soil organic adsorption coefficient represents the soil distribution coefficient (Kd) normalised for soil organic carbon content; Kow – the octanol-water partition coefficient is the ratio of the concentration of a chemical in octanol and in water at equilibrium; DT50 –the degradation rate of pesticides expressed as the time to 50% dissipation in days, months or years; LD50 – Lethal Dose is the dose that kills half (50%) of the animals tested; LC50 – Lethal Concentration is the concentration in water that kills half of the animals tested; EC50 – the Effective Concentration is the concentrations which has some deleterious, other than lethality, on 50% of the animals tested ; NOAEL – No observed adverse effect level is the highest concentration that is without adverse effects; ARfD –Acute reference dose is an estimate the amount of chemical in food or drinking water, expressed on a body weight basis, that can be ingested over a short period of time, usually during one meal or one day, without noticeable health risk to the consumer; ADI – the acceptable daily intake value is the maximum quantity of chemical that humans can absorb in a day for their entire lifespan without showing any signs of illness; NOEC – No observed effects concentration is the highest tested concentration for which there are no statistical significant difference of effect (p<0.05) when compared to the control group in long-term ecotoxicity studies; HC5 – Hazardous concentration for 5% of species is the concentration (following chronic exposure ≥28 days) where 5 % of species in the Species Sensitivity Distribution (SSD) are affected.

**Online Resource 3** Environmental fate and ecotoxicity data of insecticides used in South African forest plantations according to the Pesticides Properties Database (Adapted from Ndlovu et al. 2022)

| **Environmental fate** | | | | | | | | | |
| --- | --- | --- | --- | --- | --- | --- | --- | --- | --- |
|  | Kd | Koc | Kow | Field DT50 in soil | DT50 in water | DT50 insediment/water-sediment | Water solubility at 20 ˚C | | |
|  | (ml g-1) | (ml g-1) | (log P) | (days) | (days) | (days) | (mg L-1) | | |
| cypermethrin | 5435 | 307 558 | 5.5 | 21.9 | 3 | 17 | 0.009 | | |
| alpha-cypermethrin | 3308 | 288 735 | 5.8 | 42.6 | 1.3 | 21 | 0.004 | | |
| deltamethrin |  | 10 240 000 | 4.6 | 21 | 17 | 65 | 0.0002 | | |
| **Human-related risk** | | | | | | | | | |
|  | Drinking water standard | Acute oral LD50  (rats) | Inhalation LC50  (rats) | NOAEL  (2 years) | ARfD | Acceptable Daily Intake (ADI) | WHO Hazard class | | |
|  |  | (mg kg-1 bw) | (mg L-1 bw) | (mg kg-1 bw) | (mg kg-1 bw day-1) | (mg kg-1 bw day-1) | - | | |
| cypermethrin | Unlikely to occur in drink water2 | 287 | 3.56 | 7.5 | 0.2 | 0.05 | II (moderately hazardous) | | |
| alpha-cypermethrin |  | 40 | 1.33 | 5 | 0.04 | 0.015 | II (moderately hazardous) | | |
| deltamethrin | Unlikely to occur in drink water2 | 87 |  | 2.5 | 0.025 | 0.01 | II (moderately hazardous) | | |
| **Terrestrial organism related risk** | | | | | | | | | |
|  | Acute LC50 earthworms | Chronic NOEC earthworms | Acute LD50 oral honeybees (*Apis* spp.) | Acute LD50 contact honeybees (*Apis* spp.) | | Acute LD₅₀ birds | | Chronic NOEL birds | |
|  | (mg kg-1 soil) | (mg kg-1 soil) | (µg bee-1) | (µg bee-1) | | (mg kg⁻¹ bw) | | (mg kg⁻¹ bw day-1) | |
| cypermethrin | > 100 | > 5.3 | 0.172 | 0.023 | | > 9 520 | | 4.29 | |
| alpha-cypermethrin | > 100 | 2.0 | 0.059 | 0.033 | | > 2 025 | | 13 | |
| deltamethrin | > 645 | 0.165 | 0.07 | 0.0015 | | > 2 250 | | > 55 | |
| **Aquatic organism related risk** | | | | | | | | | |
|  | Acute LC50 trout  (96 h) | Acute EC50 *Daphnia*  (48 h) | Acute LC₅₀ aquatic crustaceans  (96 h) | Acute LC₅₀ mayflies  (96 h) | Acute EC50 algae  (72 h) | African indigenous species | Chronic NOEC freshwater fish  (21 days) | Chronic NOEC freshwater invertebrates  (21 days) | HC5 to protect 95% of freshwater species |
|  | (mg L-1) | (mg L-1) | (mg L⁻¹) | (mg L⁻¹) | (mg L⁻¹) | (mg L⁻¹) | (mg L⁻¹) | (mg L⁻¹) | (μg L-1) |
| cypermethrin | 0.00151 | 0.00021 | 0.0128 | 0.00001 (*Baetis harrisoni*)3 | > 0.0667 |  | 0.00003 | 0.00004 | Arthropods: 0.00485  Fish spp.: 0.2565 |
| alpha-cypermethrin | 0.0018 | 0.00022 |  |  | 0.084 |  | 0.00003 | 0.00003 | Arthropods: 0.00485  Fish spp.: 0.2565 |
| deltamethrin | 0.00015 | 0.00056 | 0.0000017 |  | > 0.00047 | 0.00003 (*Caridina nilotica*)4 | < 000032 | 0.0000041 | Arthropods: 0.00485  Fish spp.: 0.2565 |

1 Nemeth-Konda L, Fuleky GY, Morovjan GY, Csokan P. 2002. Sorption behaviour of acetochlor, atrazine, carbendazim, diazinon, imidacloprid and isoproturon on Hungarian agricultural soil. *Chemosphere* 48: 545–552.

2 World Health Organization. 2011. *Guidelines for drinking-water quality* (4th edn). Geneva: World Health Organization.

3 U.S. Environmental Protection Agency. 2000. *Ecotoxicity Database (EEDB): Office of Pesticide Programs, Environmental Fates and Effects Division*. Available at: https://ecotox.ipmcenters.org/results.cfm.

4Gola NP, Muller WJ. 2008. Acute effects of the synthetic pyrethroid deltamethrin on the freshwater shrimp *Caridina nilotica* (Roux). In: Totolo O (ed), *Proceedings of the 2nd IASTED Africa Conference, 8–10 September 2008, Gaborone, Botswana*. Alberta: ACTA Press. pp 28–34.

5 Giddings JM, Wirtz J, Campana D, Dobbs M. 2019. Derivation of combined species sensitivity distributions for acute toxicity of pyrethroids to aquatic animals. *Ecotoxicology* 28: 242–250.

Kd – the soil distribution coefficient/soil adsorption coefficient represents the ratio of solid phase to solute chemical concentrations, at equilibrium; Koc – the soil organic (OC) affinity coefficient/soil organic adsorption coefficient represents the soil distribution coefficient (Kd) normalised for soil organic carbon content; Kow – the octanol-water partition coefficient is the ratio of the concentration of a chemical in octanol and in water at equilibrium; DT50 –the degradation rate of pesticides expressed as the time to 50% dissipation in days, months or years; LD50 – Lethal Dose is the dose that kills half (50%) of the animals tested; LC50 – Lethal Concentration is the concentration in water that kills half of the animals tested; EC50 – the Effective Concentration is the concentrations which has some deleterious, other than lethality, on 50% of the animals tested ; NOAEL – No observed adverse effect level is the highest concentration that is without adverse effects; ARfD –Acute reference dose is an estimate the amount of chemical in food or drinking water, expressed on a body weight basis, that can be ingested over a short period of time, usually during one meal or one day, without noticeable health risk to the consumer; ADI – the acceptable daily intake value is the maximum quantity of chemical that humans can absorb in a day for their entire lifespan without showing any signs of illness; NOEC – No observed effects concentration is the highest tested concentration for which there are no statistical significant difference of effect (p<0.05) when compared to the control group in long-term ecotoxicity studies; HC5 – Hazardous concentration for 5% of species is the concentration (following chronic exposure ≥28 days) where 5 % of species in the Species Sensitivity Distribution (SSD) are affected.

**Online Resource 4** Environmental fate and ecotoxicity data for fungicides used in South African forest plantations according to the Pesticides Properties Database (Adapted from Ndlovu et al. 2022)

| **Environmental fate** | | | | | | | | | | |
| --- | --- | --- | --- | --- | --- | --- | --- | --- | --- | --- |
|  | Kd | Koc | pKa at 25 ˚C | Kow | Field DT50 in soil | DT50 in water | DT50 insediment/water-sediment | Water solubility at 20 ˚C | | |
|  | (ml g-1) | (ml g-1) | - | (log P) | (days) | (days) | (days) | (mg L-1) | | |
| azoxystrobin | 8.93 | 589 | Non-ionic | 2.5 | 180.7 | 6.1 | 205 | 6.7 | | |
| propiconazole | 33.7 | 1 086 | 1.09 | 3.72 | 35.2 | 6 | 561 | 150 | | |
| **Human-related risk** | | | | | | | | | | |
|  | Drinking water standard | Acute oral LD50  (rats) | Inhalation LC50  (rats) | NOAEL  (2 years) | ARfD | Acceptable Daily Intake (ADI) | WHO Hazard class | | | |
|  | (μg L⁻¹) | (mg kg-1 bw) | (mg L-1 bw) | (mg kg-1 bw) | (mg kg-1 bw day-1) | (mg kg-1 bw day-1) | - | | | |
| azoxystrobin |  | > 5 000 | 0.69 | 10 |  | 0.2 | U (Unlikely to present an acute hazard) | | | |
| propiconazole |  | 550 | > 5.8 |  | 0.3 | 0.04 | II (Moderately hazardous) | | | |
| **Terrestrial organism related risk** | | | | | | | | | | |
|  | Acute LC50 earthworms | Chronic NOEC earthworms | Acute LD50 oral honeybees (*Apis* spp.) | | Acute LD50 contact honeybees (*Apis* spp.) | | Acute LD₅₀ birds | | Chronic NOEL birds | |
|  | (mg kg-1 soil) | (mg kg-1 soil) | (µg bee-1) | | (µg bee-1) | | (mg kg⁻¹ bw) | | (mg kg⁻¹ bw day-1) | |
| azoxystrobin | 283 | 3 | > 25 | | > 200 | | > 2 000 | | 1 200 | |
| propiconazole | 686 | 6.47 | > 100 | | > 100 | | > 2 510 | | 25.5 | |
| **Aquatic organism related risk** | | | | | | | | | | |
|  | Acute LC50 trout  (96 h) | Acute LC50 *Leiostomus*  (96 h) | Acute EC50 *Daphnia*  (48 h) | Acute LC₅₀ aquatic crustaceans  (96 h) | Acute LC₅₀ mayflies  (96 h) | Acute EC50 algae  (72 h) | African indigenous species | Chronic NOEC freshwater fish  (21 days) | Chronic NOEC freshwater invertebrates  (21 days) | HC5 to protect 95% of freshwater species |
|  | (mg L-1) | (mg L-1) | (mg L-1) | (mg L⁻¹) | (mg L⁻¹) | (mg L⁻¹) | (mg L⁻¹) | (mg L⁻¹) | (mg L⁻¹) | (mg L⁻¹) |
| azoxystrobin | 0.47 |  | 0.23 | 0.055 |  | 0.36 |  | 0.147 | 0.044 | - |
| propiconazole |  | 2.6 | 10.2 | 0.37 |  | 0.093 |  | 0.068 | 0.31 | - |

Kd – the soil distribution coefficient/soil adsorption coefficient represents the ratio of solid phase to solute chemical concentrations, at equilibrium; Koc – the soil organic (OC) affinity coefficient/soil organic adsorption coefficient represents the soil distribution coefficient (Kd) normalised for soil organic carbon content; Kow – the octanol-water partition coefficient is the ratio of the concentration of a chemical in octanol and in water at equilibrium; DT50 –the degradation rate of pesticides expressed as the time to 50% dissipation in days, months or years; LD50 – Lethal Dose is the dose that kills half (50%) of the animals tested; LC50 – Lethal Concentration is the concentration in water that kills half of the animals tested; EC50 – the Effective Concentration is the concentrations which has some deleterious, other than lethality, on 50% of the animals tested ; NOAEL – No observed adverse effect level is the highest concentration that is without adverse effects; ARfD –Acute reference dose is an estimate the amount of chemical in food or drinking water, expressed on a body weight basis, that can be ingested over a short period of time, usually during one meal or one day, without noticeable health risk to the consumer; ADI – the acceptable daily intake value is the maximum quantity of chemical that humans can absorb in a day for their entire lifespan without showing any signs of illness; NOEC – No observed effects concentration is the highest tested concentration for which there are no statistical significant difference of effect (p<0.05) when compared to the control group in long-term ecotoxicity studies; HC5 – Hazardous concentration for 5% of species is the concentration (following chronic exposure ≥28 days) where 5 % of species in the Species Sensitivity Distribution (SSD) are affected.
